# Supplementary material for: Options for improving low birthweight and prematurity birth outcomes of indigenous and culturally and linguistically diverse infants: a systematic review of the literature using the social-ecological model
Source: Springer Nature journal article supplement (doi:10.1186/s12884-021-04307-1), 2022-01-03
Supplement: MOESM2 [file 19991334]

## Literature Search Strategy

### Pubmed CALD Search Strategy (216 results)

(((((refugee) OR (migrant\*)) OR (asylum seeker)) AND (((((((birthweight) OR (preterm birth)) OR (pre-term birth)) OR (neonatal weight)) OR ("birth weight"[MeSH Terms])) OR (infant, low birth weight[MeSH Terms])) OR ("birth outcome\*")) OR (birth outcome\*))) AND (intervention) ) AND (study)  
+ limits for [English] [published between December 2009-January 2020]

### Pubmed Indigenous Search Strategy (792 results)

((((((indigenous people\*[MeSH Terms]) OR (indigenous)) OR ("first nation\*")) OR ("first nation people\*")) OR (aboriginal))) AND (((((((birthweight) OR (preterm birth)) OR (prematu\*)) OR (pre-term birth)) OR (neonatal weight)) OR ("birth weight"[MeSH Terms])) OR (infant, low birth weight[MeSH Terms])) OR (birth outcome)) OR (birth outcome\*) OR ("birth outcome\*")) AND ((study) OR (intervention))  
+ limits for [English] [published between December 2009-January 2020]

### SCOPUS CALD search strategy (340 results)

(( (TITLE-ABS-KEY ("birth weight" OR birthweight OR "birth outcome\*" OR "preterm birth" OR prematu\* OR "pre-term birth" OR "neonatal weight" )) AND (TITLE-ABS-KEY (refugee OR migrant\* OR "asylum seeker" ))) AND (TITLE-ABS-KEY (intervention OR study OR trial )) AND (LIMIT-TO (PUBYEAR , 2020 ) OR LIMIT-TO (PUBYEAR , 2019 ) OR LIMIT-TO (PUBYEAR , 2018 ) OR LIMIT-TO (PUBYEAR , 2017 ) OR LIMIT-TO (PUBYEAR , 2016 ) OR LIMIT-TO (PUBYEAR , 2015 ) OR LIMIT-TO (PUBYEAR , 2014 ) OR LIMIT-TO (PUBYEAR , 2013 ) OR LIMIT-TO (PUBYEAR , 2012 ) OR LIMIT-TO (PUBYEAR , 2011 ) OR LIMIT-TO (PUBYEAR , 2010 ) OR LIMIT-TO (PUBYEAR , 2009 )) AND (LIMIT-TO (LANGUAGE , "English" ))

### SCOPUS Indigenous search strategy (460 results)

(( (TITLE-ABS-KEY (aborigin\* OR indigenous OR {first nation\*} )) AND (TITLE-ABS-KEY ("birth weight" OR birthweight OR "birth outcome\*" OR "preterm birth" OR prematu\* OR "pre-term birth" OR "neonatal weight" ))) AND (TITLE-ABS-KEY (intervention OR study OR trial )) AND (LIMIT-TO (PUBYEAR , 2020 ) OR LIMIT-TO (PUBYEAR , 2019 ) OR LIMIT-TO (PUBYEAR , 2018 ) OR LIMIT-TO (PUBYEAR , 2017 ) OR LIMIT-TO (PUBYEAR , 2016 ) OR LIMIT-TO (PUBYEAR , 2015 ) OR LIMIT-TO (PUBYEAR , 2014 ) OR LIMIT-TO (PUBYEAR , 2013 ) OR LIMIT-TO (PUBYEAR , 2012 ) OR LIMIT-TO (PUBYEAR , 2011 ) OR LIMIT-TO (PUBYEAR , 2010 ) OR LIMIT-TO (PUBYEAR , 2009 )) AND (LIMIT-TO (LANGUAGE , "English" ))

### CINAHL CALD search strategy (336 results)

refugees or asylum seekers or displaced or migrants or immigrants or emmigration  
AND

birthweight OR ( birth weight or birth size or fetal weight ) OR ( preterm birth or  
premature birth or preterm labor or preterm delivery or prematurity ) OR "birth  
weight" OR birth outcome racial disparities OR ( birth outcomes or pregnancy  
outcomes or delivery outcomes or vaginal birth ) OR neonatal weight

AND

Intervention

Study or trial

+ limits [English] [published between December 2009-January 2020]

#### **CINAHL Indigenous search strategy (433 results)**

indigenous or native or aboriginal or first nations or inuit or metis ) OR indigenous  
peoples OR indigenous women OR aborigin\*

AND

birthweight OR ( birth weight or birth size or fetal weight ) OR ( preterm birth or  
premature birth or preterm labor or preterm delivery or prematurity ) OR "birth  
weight" OR birth outcome racial disparities OR ( birth outcomes or pregnancy  
outcomes or delivery outcomes or vaginal birth ) OR neonatal weight

AND

Intervention

Study or trial

+ limits [English] [published between December 2009- January 2020]

#### **Medline CALD search strategy (497 results)**

refugees or asylum seekers or displaced or migrants or immigrants or emmigration  
AND

birthweight OR ( birth weight or birth size or fetal weight ) OR ( preterm birth or  
premature birth or preterm labor or preterm delivery or prematurity ) OR "birth  
weight" OR birth outcome racial disparities OR ( birth outcomes or pregnancy  
outcomes or delivery outcomes or vaginal birth ) OR neonatal weight

AND

Intervention

Study or trial

+ limits [English] [published between December 2009-January 2020]

#### **Medline Indigenous search strategy (718 results)**

indigenous or native or aboriginal or first nations or inuit or metis ) OR indigenous  
peoples OR indigenous women OR aborigin\*

AND

birthweight OR ( birth weight or birth size or fetal weight ) OR ( preterm birth or  
premature birth or preterm labor or preterm delivery or prematurity ) OR "birth  
weight" OR birth outcome racial disparities OR ( birth outcomes or pregnancy  
outcomes or delivery outcomes or vaginal birth ) OR neonatal weight

AND

Intervention

Study or trial

+ limits [English] [published between December 2009-January 2020]
